# Supplementary material
Source: HighWire-hosted journal article supplement (https://rapm.bmj.com/highwire/filestream/22245/field_highwire_adjunct_files/0/rapm-2023-104439supp001_data_supplement.pdf)
Supplement: rapm-2023-104439supp001_data_supplement.pdf [file rapm-2023-104439supp001_data_supplement.pdf]

Supplementary Figure 1A. Surgical field of a totally endoscopic aortic valve replacement (TEAVR)

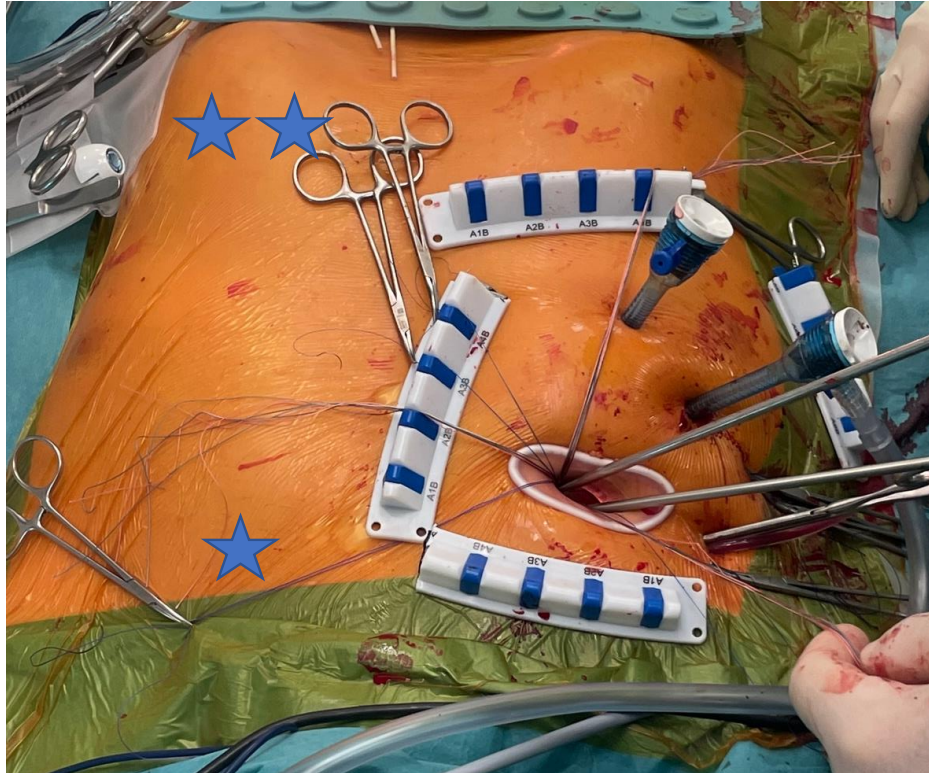

Over the right anterior hemithorax three 5mm trocar ports and one utility port are inserted. The second intercostal space is spread with a soft tissue retractor. The cranial (\*) and caudal (\*\*) side of the patient are marked.

Supplementary Figure 1B. Ultrasound view of a SAPB after TEAVR.

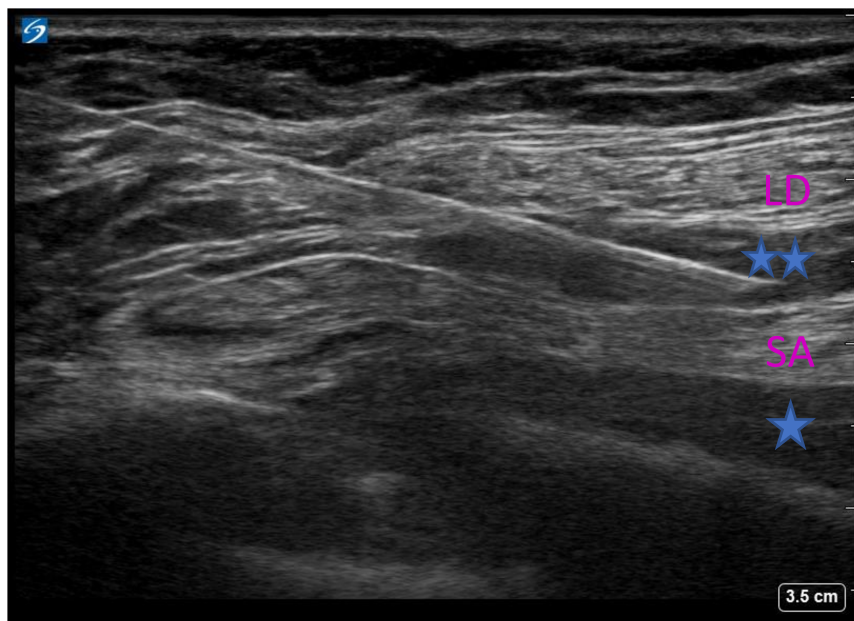

Ultrasound view of a SAPB after TEAVR. Spread of local anesthetics can be seen in the deep SAP between the 5<sup>th</sup> rib (\*) and the serratus muscle (\*\*). Next, the needle was withdrawn for a superficial injection between the serratus (\*\*\*) and latissimus dorsi muscles. LD = latissimus dorsi, SA = serratus anterior muscle

## Supplementary Methods

The extubation criteria and ICU dismissal criteria are standardized within our ICU.

The criteria for extubation are being conscious and comfortable, to have stable hemodynamics, a  $\text{FiO}_2 < 60\%$ , temperature  $> 35.5^\circ\text{C}$  and a minimal blood loss.

The criteria for ICU dismissal are stable hemodynamics and heart rhythm (not paced), weaned off vasopressors/inotropes, nasal prongs  $< 4\text{L O}_2/\text{min}$  and Acute Kidney Injury maximal KDIGO 2.

### Supplementary Table 1 Quality of Recovery outcomes.

|                               | No block             | Serratus anterior plane block | Difference (95% CI) | P-value |
|-------------------------------|----------------------|-------------------------------|---------------------|---------|
| Sample size, n                | 37                   | 38                            |                     |         |
| Subcutaneous emphysema, n (%) | 7 (18.9)             | 7 (18.4)                      | 0.0 [-0.2, 0.2]     | 0.95    |
| POAF n (%)                    | 6 (16.2)             | 7 (18.4)                      | 0.0 [-0.2, 0.2]     | 0.80    |
| Pneumonia n (%)               | 0 (0.0)              | 1 (2.6)                       | 0 [0.1, 0.1]        | 0.32    |
| Patient satisfaction          | 8 (7.8, 9.0)         | 8.0 (7.0, 9.3)                | 0 [-1.0, 1.0]       | 0.92    |
| POD 2                         |                      |                               |                     |         |
| EQ5D                          |                      |                               |                     |         |
| Index                         | 0.5 (0.4, 0.6)       | 0.5 (0.4, 0.7)                | -0.2 [-0.1, 0.1]    | 0.59    |
| VAS score                     | 60.0 (50.0, 77.5)    | 70.0 (53.8, 80.0)             | -5.0 [-10.0, 0.0]   | 0.18    |
| SF-36                         |                      |                               |                     |         |
| Physical functioning          | 20.0 (0.0, 45.0)     | 20.0 (0.0, 56.3)              | -5.0 [-15.0, 5.0]   | 0.33    |
| Role-physical health          | 0.0 (0.0, 0.0)       | 0.0 (0.0, 25.0)               | 0.0 [0.0, 0.0]      | 0.09    |
| Pain                          | 45.0 (33.8, 67.5)    | 67.5 (45.0, 80.0)             | -10.0 [-22.5, 0.0]  | 0.08    |
| General health                | 80.0 (67.5, 85.0)    | 70.0 (58.8, 80.0)             | 5.0 [0.0, 15.0]     | 0.06    |
| Role-emotional health         | 100.0 (16.66, 100.0) | 100.0 (91.7, 100.0)           | 0.0 [0.0, 0.0]      | 0.63    |
| Energy                        | 55.0 (40.0, 75.0)    | 55.0 (38.8, 65.8)             | 4.0 [-10.0, 15.0]   | 0.65    |
| Emotional wellbeing           | 92.0 (78.0, 100.0)   | 86.0 (68.0, 100.0)            | 0.0 [-4.0, 12.0]    | 0.63    |
| Social functioning            | 62.5 (37.5, 88.8)    | 75.0 (50.0, 100.0)            | -10.0 [-25.0, 0.0]  | 0.20    |
| POD 7                         |                      |                               |                     |         |
| EQ5D                          |                      |                               |                     |         |
| Index                         | 0.8 (0.6, 0.9)       | 0.8 (0.7, 0.8)                | 0.0 [-0.5, 0.1]     | 0.43    |
| VAS score                     | 70.0 (60.0, 80.0)    | 70.0 (57.5, 80.0)             | 0.0 [-5.0, 10.0]    | 0.76    |
| SF-36                         |                      |                               |                     |         |
| Physical functioning          | 60.0 (35.0, 77.5)    | 55.0 (35.0, 71.3)             | 5.0 [-10.0, 15.0]   | 0.59    |
| Role-physical health          | 0.0 (0.0, 100.0)     | 0.0 (0.0, 6.3)                | 0.0 [0.0, 25.0]     | 0.02    |
| Pain                          | 77.5 (57.5, 95.0)    | 67.5 (56.9, 90.0)             | 2.5 [-7.5, 12.5]    | 0.38    |
| General health                | 75.0 (65.0, 86.3)    | 75.0 (63.8, 85.0)             | 5.0 [-5.0, 10.0]    | 0.28    |
| Role-emotional health         | 100.0 (100.0, 100.0) | 100.0 (100.0, 100.0)          | 0.0 [0.0, 0.0]      | 0.17    |
| Energy                        | 60.0 (45.0, 82.5)    | 60.0 (43.75, 70.0)            | 0.0 [-10.0, 15.0]   | 0.71    |
| Emotional wellbeing           | 96.0 (80.0, 100.0)   | 92.0 (80.0, 100.0)            | 0.0 [-3.0, 8.0]     | 0.50    |
| Social functioning            | 100.0 (75.0, 100.0)  | 75.0 (62.5, 100.0)            | 0.0 [0.0, 12.5]     | 0.44    |

Data are expressed as median (25%, 75%). A p-value  $< 0.05$  is considered statistically significant.
